# Supplementary material
Source: PubMed Central journal article supplement (PMC1484573)
Supplement: pcbi.0020054.sd002.pdf [file pcbi.0020054.sd002.pdf]

| Gene Name  | Accession number | Family    | Group | Found In Step | Complete TM-regions | Complete/partial cds | Comment                                                                                                              |
|------------|------------------|-----------|-------|---------------|---------------------|----------------------|----------------------------------------------------------------------------------------------------------------------|
| ggBAI1     | NA               | Adhesion  |       | 1             | Y                   | partial              | missing 17:th exon (GPS-motif) due to poor genomic sequence                                                          |
| ggBAI2     | NA               | Adhesion  |       | 1             | N                   | partial              | missing extracellular region completely, missing parts of tm-regions and cytosolic part due to poor genomic sequence |
| ggBAI3     | NA               | Adhesion  |       | 1             | Y                   | partial              | missing one exon in extracellular part and one exon in cytosolic part due to poor genomic sequence                   |
| ggCELSR1   | NA               | Adhesion  |       | 1             | Y                   | partial              | missing exons in extracellular part and one exon in cytosolic part                                                   |
| ggCELSR3   | NA               | Adhesion  |       | 1             | Y                   | partial              | missing exons in extracellular part and one exon in cytosolic part                                                   |
| ggETL      | NA               | Adhesion  |       | 1             | Y                   | complete             |                                                                                                                      |
| ggGPR112   | NA               | Adhesion  |       | 1             | Y                   | partial              | missing extracellular region completely, missing the last two exons in cytosolic part                                |
| ggGPR114   | NA               | Adhesion  |       | 4             | N                   | partial              | missing parts of extracellular region, transmembrane region and the last exon in the cytosolic part                  |
| ggGPR115   | NA               | Adhesion  |       | 1             | Y                   | partial              | missing part of extracellular region and the last exon in cytosolic part                                             |
| ggGPR116   | NA               | Adhesion  |       | 1             | Y                   | partial              | missing part of extracellular region and the last exon in cytosolic part                                             |
| ggGPR123   | NA               | Adhesion  |       | 1             | Y                   | partial              | missing exon 1-11                                                                                                    |
| ggGPR124   | NA               | Adhesion  |       | 1             | Y                   | partial              | missing exon 1-7                                                                                                     |
| ggGPR125   | NA               | Adhesion  |       | 1             | Y                   | partial              | missing exon 1                                                                                                       |
| ggGPR126   | NA               | Adhesion  |       | 1             | Y                   | partial              | missing start Met                                                                                                    |
| ggGPR128   | NA               | Adhesion  |       | 4             | Y                   | partial              | missing parts of extracellular region and cytosolic region                                                           |
| ggGPR133   | NA               | Adhesion  |       | 4             | Y                   | partial              | missing part of extracellular region and part of cytosolic region                                                    |
| ggGPR144   | NA               | Adhesion  |       | 4             | Y                   | partial              | missing part of extracellular region and part of cytosolic region                                                    |
| ggGPR97    | NA               | Adhesion  |       | 4             | N                   | partial              | missing parts of extracellular region and cytosolic region                                                           |
| ggHE6      | NA               | Adhesion  |       | 2             | N                   | partial              | Missin parts of extracellular region and two internal exons                                                          |
| ggLEC2     | NA               | Adhesion  |       | 1             | Y                   | complete             |                                                                                                                      |
| ggLEC3     | NA               | Adhesion  |       | 1             | Y                   | partial              | missing exon 1 and 7                                                                                                 |
| ggVLGR1    | NA               | Adhesion  |       | 1             | Y                   | partial              | missing exon 26-27                                                                                                   |
| ggFZD1     | O57328           | Frizzled  |       | Known         | Y                   | complete             |                                                                                                                      |
| ggFZD10    | NP_989429        | Frizzled  |       | Known         | Y                   | complete             |                                                                                                                      |
| ggFZD2     | NP_989553        | Frizzled  |       | Known         | Y                   | complete             |                                                                                                                      |
| ggFZD3     | NA               | Frizzled  |       | 1             | Y                   | complete             |                                                                                                                      |
| ggFZD4     | NP_989430        | Frizzled  |       | Known         | Y                   | complete             |                                                                                                                      |
| ggFZD6     | AAQ24762         | Frizzled  |       | Known         | N                   | partial              | missing part of extracellular region, transmembrane region and part of cytosolic region                              |
| ggFZD7     | NP_989552        | Frizzled  |       | Known         | Y                   | complete             |                                                                                                                      |
| ggFZD8     | NA               | Frizzled  |       | 1             | N                   | partial              | missing part of extracellular region, transmembrane region and part of cytosolic region due to poor genomic sequence |
| ggFZD9     | Q9IA02           | Frizzled  |       | Known         | Y                   | partial              | missing part of extracellular region and part of cytosolic region                                                    |
| ggFZDn1    | BAA89403         | Frizzled  |       | Known*        | N                   | partial              | missing part of extracellular region, transmembrane region and part of cytosolic region due to poor genomic sequence |
| ggSMO      | O42224           | Frizzled  |       | Known         | Y                   | partial              | missing part of exon 1 due to poor genomic sequence                                                                  |
| ggCASR     | NA               | Glutamate |       | 1             | Y                   | partial              | missing exon 3                                                                                                       |
| ggGABBR2   | NA               | Glutamate |       | 1             | Y                   | partial              | missing exon 1                                                                                                       |
| ggGPRC5A/D | NA               | Glutamate |       | 2             | Y                   | partial              | Missing last two exons                                                                                               |
| ggGPR158   | NA               | Glutamate |       | 2             | Y                   | partial              | missing exon 1                                                                                                       |
| ggGPRC5B   | NA               | Glutamate |       | 1             | Y                   | partial              | missing last exon                                                                                                    |
| ggGPRC5C   | NA               | Glutamate |       | 1             | Y                   | partial              | missing last two exons                                                                                               |
| ggGPRC6A   | NA               | Glutamate |       | 1             | Y                   | complete             |                                                                                                                      |
| ggGRM1     | NA               | Glutamate |       | 1             | Y                   | partial              | missing parts of extracellular region and cytosolic region                                                           |
| ggGRM2     | NA               | Glutamate |       | 3             | Y                   | partial              | missing parts of extracellular region and cytosolic region                                                           |
| ggGRM3     | NA               | Glutamate |       | 2             | Y                   | partial              | missing the last two exons                                                                                           |
| ggGRM5     | AAK01487.1       | Glutamate |       | Known         | Y                   | complete             |                                                                                                                      |
| ggGRM7     | NA               | Glutamate |       | 3             | Y                   | partial              | missing exon 1 and part of exon 2                                                                                    |
| ggGRM8     | NA               | Glutamate |       | 1             | Y                   | partial              | missing last exon                                                                                                    |
| ggTAS1R1   | NA               | Glutamate |       | 1             | Y                   | partial              | missing exon 1 and exon 2                                                                                            |
| ggTAS1R3   | NA               | Glutamate |       | 1             | Y                   | complete             |                                                                                                                      |
| ggGPCR150  | NA               | Other     |       | 1             | ND                  | NA                   |                                                                                                                      |
| ggGPR120   | NA               | Other     |       | 3             | ND                  | partial              | missing first and last exon                                                                                          |
| ggGPR135   | NA               | Other     |       | 1             | ND                  | partial              | Missing first part due to poor genomic sequence                                                                      |
| ggGPR139   | NA               | Other     |       | 1             | ND                  | complete             |                                                                                                                      |
| ggGPR142   | NA               | Other     |       | 1             | ND                  | NA                   |                                                                                                                      |
| ggGPR88    | NA               | Other     |       | 1             | ND                  | NA                   |                                                                                                                      |

|                      |             |             |        |    |          |                                                                                         |
|----------------------|-------------|-------------|--------|----|----------|-----------------------------------------------------------------------------------------|
| ggIEDA               | NP_989993.1 | Other       | Known  | ND | NA       |                                                                                         |
| ggNOVEL26            | NA          | Other       | 4      | ND | NA       |                                                                                         |
| ggNOVEL7             | NA          | Other       | 1      | ND | NA       |                                                                                         |
| ggPGR10              | NA          | Other       | 4      | ND | NA       |                                                                                         |
| ggTM7SF1             | NP_00102623 | Other       | Known  | ND | NA       |                                                                                         |
| ggTM7SF1b            | NA          | Other       | 1      | ND | NA       |                                                                                         |
| ggTRHR               | NP_990261.1 | Other       | Known  | ND | complete |                                                                                         |
| ggTRHR2              | NA          | Other       | 1      | ND | partial  | missing part of transmembrane region and cytosolic part due to poor genomic sequence    |
| ggOA1                | NA          | Other       | 4      | ND | NA       | missing last exon                                                                       |
| ggPERVAR1            | NA          | Other       | 4      | ND | partial  | Missing first part due to poor genomic sequence                                         |
| ggGPR141a            | NA          | Other       | 1      | ND | complete |                                                                                         |
| ggGPR141b            | NA          | Other       | 1      | ND | complete |                                                                                         |
| ggGPR146             | NA          | Other       | 3      | ND | partial  | missing part of transmembrane region due to poor genomic sequence                       |
| ggADORA1             | NP_989647.1 | Rhodopsin A | Known* | Y  | complete |                                                                                         |
| ggADORA2Ba           | AAM46927.1  | Rhodopsin A | Known* | Y  | complete |                                                                                         |
| ggADORA2Bb           | NP_990418.1 | Rhodopsin A | Known  | Y  | complete |                                                                                         |
| ggADORA3             | NP_989482.1 | Rhodopsin A | Known  | Y  | complete |                                                                                         |
| ggADRA1A             | NA          | Rhodopsin A | 1      | Y  | complete |                                                                                         |
| ggADRA1B             | NA          | Rhodopsin A | 3      | Y  | partial  | unclear start of last exon                                                              |
| ggADRA1D             | NA          | Rhodopsin A | 1      | Y  | complete |                                                                                         |
| ggADRA2A             | NA          | Rhodopsin A | 1      | N  | partial  | partial due to poor genomic sequence                                                    |
| ggADRA2B             | NA          | Rhodopsin A | 4      | Y  | complete |                                                                                         |
| ggADRA2C             | NA          | Rhodopsin A | 1      | Y  | partial  | partial due to poor genomic sequence                                                    |
| ggADRB1              | NA          | Rhodopsin A | 1      | Y  | complete | uncertain about the extra exon in the end of the gene                                   |
| ggADRB2              | NA          | Rhodopsin A | 3      | Y  | complete |                                                                                         |
| ggADRB3              | NA          | Rhodopsin A | 1      | N  | partial  | missing part of extracellular region and cytosolic region                               |
| ggBlueSensitiveOpsin | NP_990848.1 | Rhodopsin A | Known  | Y  | complete |                                                                                         |
| ggCHRM2              | A40972      | Rhodopsin A | Known  | Y  | complete |                                                                                         |
| ggCHRM3              | NP_990730.1 | Rhodopsin A | Known  | Y  | complete |                                                                                         |
| ggCHRM4              | P17200      | Rhodopsin A | Known  | Y  | complete |                                                                                         |
| ggCHRM5              | AAF19027.1  | Rhodopsin A | Known  | Y  | complete |                                                                                         |
| ggCNR1               | NA          | Rhodopsin A | 1      | Y  | complete |                                                                                         |
| ggCNR2               | NA          | Rhodopsin A | 2      | Y  | complete |                                                                                         |
| ggDRD1A              | A55886      | Rhodopsin A | Known  | Y  | complete |                                                                                         |
| ggDRD1D              | C55886      | Rhodopsin A | Known  | Y  | complete |                                                                                         |
| ggDRD2               | NA          | Rhodopsin A | 3      | Y  | complete |                                                                                         |
| ggDRD4               | NA          | Rhodopsin A | 1      | N  | partial  | missing part of extracellular region, transmembrane region and part of cytosolic region |
| ggDRD5               | NA          | Rhodopsin A | 1      | Y  | partial  | missing start Met due to poor sequence                                                  |
| ggEDG1               | NA          | Rhodopsin A | 1      | Y  | complete |                                                                                         |
| ggEDG2               | NA          | Rhodopsin A | 1      | Y  | complete |                                                                                         |
| ggEDG3               | NA          | Rhodopsin A | 1      | Y  | complete |                                                                                         |
| ggEDG4               | NA          | Rhodopsin A | 1      | N  | partial  | partial due to poor genomic sequence                                                    |
| ggEDG6               | NA          | Rhodopsin A | 1      | Y  | complete |                                                                                         |
| ggEDG7               | NA          | Rhodopsin A | 1      | Y  | complete |                                                                                         |
| ggGPR119n1           | NA          | Rhodopsin A | 1      | Y  | complete |                                                                                         |
| ggGPR12              | NA          | Rhodopsin A | 2      | Y  | complete |                                                                                         |
| ggGPR136             | NA          | Rhodopsin A | 1      | N  | partial  | missing part of transmembrane region due to poor genomic sequence                       |
| ggGPR136n1           | NA          | Rhodopsin A | 1      | Y  | complete |                                                                                         |
| ggGPR148             | NA          | Rhodopsin A | 1      | Y  | complete |                                                                                         |
| ggGPR153             | NA          | Rhodopsin A | 2      | Y  | partial  | missing last two exons                                                                  |
| ggGPR162             | NA          | Rhodopsin A | 2      | Y  | complete |                                                                                         |
| ggGPR26              | NA          | Rhodopsin A | 1      | Y  | complete |                                                                                         |
| ggGPR26n1            | NA          | Rhodopsin A | 1      | Y  | complete |                                                                                         |
| ggGPR52              | NA          | Rhodopsin A | 1      | Y  | complete |                                                                                         |
| ggGPR6               | NA          | Rhodopsin A | 1      | Y  | partial  | missing start Met                                                                       |
| ggGPR61              | NA          | Rhodopsin A | 1      | N  | partial  | missing N-term due to Ns                                                                |
| ggGPR63              | NA          | Rhodopsin A | 1      | Y  | complete |                                                                                         |

|                            |             |           |   |        |   |          |                                                 |
|----------------------------|-------------|-----------|---|--------|---|----------|-------------------------------------------------|
| ggMECn1                    | NA          | Rhodopsin | A | 1      | Y | complete |                                                 |
| ggGREENOPSIN               | NP_990821.1 | Rhodopsin | A | Known  | Y | complete |                                                 |
| ggHRH1                     | NA          | Rhodopsin | A | 3      | Y | complete |                                                 |
| ggHRH2                     | NA          | Rhodopsin | A | 1      | Y | complete |                                                 |
| ggHRH3                     | NA          | Rhodopsin | A | 1      | Y | complete |                                                 |
| ggHRH3n1a                  | NA          | Rhodopsin | A | 1      | Y | complete |                                                 |
| ggHRH3n1b                  | NA          | Rhodopsin | A | 1      | Y | complete |                                                 |
| ggHTR1A                    | NA          | Rhodopsin | A | 1      | Y | complete |                                                 |
| ggHTR1B                    | NA          | Rhodopsin | A | 1      | Y | complete |                                                 |
| ggHTR1D                    | NA          | Rhodopsin | A | 4      | Y | complete |                                                 |
| ggHTR1E                    | NA          | Rhodopsin | A | 1      | Y | complete |                                                 |
| ggHTR1F                    | NA          | Rhodopsin | A | 3      | Y | complete |                                                 |
| ggHTR2A                    | NA          | Rhodopsin | A | 3      | Y | complete |                                                 |
| ggHTR2B                    | AAF20211.1  | Rhodopsin | A | Known  | N | partial  |                                                 |
| ggHTR2C                    | NA          | Rhodopsin | A | 1      | Y | complete |                                                 |
| ggHTR4                     | NA          | Rhodopsin | A | 1      | Y | partial  | missing first and last exon                     |
| ggHTR5                     | NA          | Rhodopsin | A | 1      | Y | complete |                                                 |
| ggHTR6                     | NA          | Rhodopsin | A | 1      | Y | complete |                                                 |
| ggHTR7                     | NA          | Rhodopsin | A | 1      | N | partial  | missing first Met due to poor genomic sequence  |
| ggHTR7n1                   | NA          | Rhodopsin | A | 1      | Y | partial  | missing first Met due to poor genomic sequence  |
| ggIodopsin                 | NP_990771.1 | Rhodopsin | A | Known  | Y | complete |                                                 |
| ggMC1R                     | AAO69658.1  | Rhodopsin | A | Known  | Y | complete |                                                 |
| ggMC2R                     | BAA24002.1  | Rhodopsin | A | Known  | Y | complete |                                                 |
| ggMC3R                     | BAA32555.1  | Rhodopsin | A | Known  | Y | complete |                                                 |
| ggMC4R                     | BAA25252.1  | Rhodopsin | A | Known  | Y | complete |                                                 |
| ggMC5R                     | BAA25640.1  | Rhodopsin | A | Known  | Y | complete |                                                 |
| ggMTN1A                    | NP_990693.1 | Rhodopsin | A | Known  | Y | complete | more similar to human MTN1A than ggMTN1A is.    |
| ggMTN1C                    | NP_990692.1 | Rhodopsin | A | Known  | Y | complete | Alt. MTN1C                                      |
| ggMTN1B                    | P51050      | Rhodopsin | A | Known  | N | partial  |                                                 |
| ggOPN3                     | NA          | Rhodopsin | A | 1      | Y | complete |                                                 |
| ggOPN4                     | NA          | Rhodopsin | A | 1      | Y | partial  | missing exon 1                                  |
| ggOPN4n1                   | NP_989956.1 | Rhodopsin | A | Known  | Y | complete | Alt.putative photopigment melanopsin            |
| ggOPSNn1                   | NA          | Rhodopsin | A | 1      | N | partial  | saknar exon1, exon3 och slutet.                 |
| ggPNR                      | NA          | Rhodopsin | A | 1      | Y | complete |                                                 |
| ggPTGER2                   | NA          | Rhodopsin | A | 1      | N | partial  | short sequence due to poor genomic sequence     |
| ggPTGER3                   | NA          | Rhodopsin | A | 1      | N | partial  |                                                 |
| ggPTGER4                   | NA          | Rhodopsin | A | 1      | Y | complete | lack human specific insertion in exon 1         |
| ggPTGFR                    | NA          | Rhodopsin | A | 1      | Y | complete |                                                 |
| ggRE2                      | NA          | Rhodopsin | A | 2      | Y | complete |                                                 |
| ggRGR                      | NA          | Rhodopsin | A | 1      | Y | complete |                                                 |
| ggRHO                      | BAA00610.1  | Rhodopsin | A | Known  | Y | complete |                                                 |
| ggRRH                      | NA          | Rhodopsin | A | 1      | Y | complete |                                                 |
| ggSREB2                    | NA          | Rhodopsin | A | 2      | Y | complete |                                                 |
| ggSREB3                    | NA          | Rhodopsin | A | 2      | N | partial  | Missing large part of the gene due to Ns        |
| ggTAR1                     | NA          | Rhodopsin | A | 1      | Y | complete |                                                 |
| ggTAR2                     | NA          | Rhodopsin | A | 4      | Y | complete |                                                 |
| ggVioletSensitiveConeOpsin | NP_990769.1 | Rhodopsin | A | Known  | Y | complete |                                                 |
| ggGPR119                   | NA          | Rhodopsin | A | 1      | Y | complete |                                                 |
| ggAVPR1A                   | NA          | Rhodopsin | B | 3      | N | partial  | Missing first part due to poor genomic sequence |
| ggAVPR1B                   | AAG17937.2  | Rhodopsin | B | Known  | Y | complete |                                                 |
| ggBRS3                     | NP_989737.1 | Rhodopsin | B | Known* | Y | complete |                                                 |
| ggCCKAR                    | NA          | Rhodopsin | B | 1      | Y | complete |                                                 |
| ggCCKBR                    | CAD33800.1  | Rhodopsin | B | Known  | Y | complete |                                                 |
| ggEDNRA                    | NP_989450.1 | Rhodopsin | B | Known  | Y | complete |                                                 |
| ggEDNRB                    | NP_989451.1 | Rhodopsin | B | Known  | Y | complete |                                                 |
| ggEDNRBn1                  | AAM74023.1  | Rhodopsin | B | Known  | Y | complete |                                                 |
| ggETBRLP1                  | NA          | Rhodopsin | B | 2      | Y | partial  | Missing first part due to poor genomic sequence |

|                |             |             |        |   |          |                                                                    |
|----------------|-------------|-------------|--------|---|----------|--------------------------------------------------------------------|
| ggETBRLP2      | NA          | Rhodopsin B | 1      | Y | complete |                                                                    |
| ggGHSR_ghrelin | NP_989725.1 | Rhodopsin B | Known* | Y | complete |                                                                    |
| ggGNRHR1I      | NP_00101262 | Rhodopsin B | Known  | Y | complete |                                                                    |
| ggGNRHR        | NP_989984.1 | Rhodopsin B | Known  | Y | complete |                                                                    |
| ggGPR          | NA          | Rhodopsin B | 1      | Y | complete |                                                                    |
| ggGPR103       | NA          | Rhodopsin B | 1      | Y | partial  | missing exon 1                                                     |
| ggGPR154       | NA          | Rhodopsin B | 1      | Y | complete |                                                                    |
| ggGPR19        | NA          | Rhodopsin B | 2      | Y | complete |                                                                    |
| ggGPR39        | NA          | Rhodopsin B | 1      | Y | complete |                                                                    |
| ggGPR72        | NA          | Rhodopsin B | 2      | Y | complete |                                                                    |
| ggGPR72n1      | NA          | Rhodopsin B | 1      | Y | complete |                                                                    |
| ggGPR73/73L1   | NA          | Rhodopsin B | 1      | Y | complete |                                                                    |
| ggGPR75        | NA          | Rhodopsin B | 1      | Y | partial  | missing part of extracellular region due to poor genomic sequence  |
| ggGRPR         | NP_989738.1 | Rhodopsin B | Known  | Y | complete |                                                                    |
| ggHCRTR2       | NP_00101975 | Rhodopsin B | Known  | Y | complete |                                                                    |
| ggMLNR         | NA          | Rhodopsin B | 2      | Y | complete | one big deletion compared to human sequence homolog                |
| ggNMBR         | NA          | Rhodopsin B | 1      | Y | complete |                                                                    |
| ggNMUR1        | NA          | Rhodopsin B | 1      | Y | complete |                                                                    |
| ggNMUR2        | NA          | Rhodopsin B | 2      | Y | complete |                                                                    |
| ggNPFF1        | NP_989693.1 | Rhodopsin B | Known  | Y | partial  | missing first part of extracellular region                         |
| ggNPFF2        | BAE17048.1  | Rhodopsin B | Known  | Y | partial  | missing exon 1                                                     |
| ggNPY1R        | AAK83557.1  | Rhodopsin B | Known  | Y | complete |                                                                    |
| ggNPY2R        | Q9DDN6      | Rhodopsin B | Known  | Y | complete |                                                                    |
| ggNPY5R        | AAK83556.1  | Rhodopsin B | Known  | Y | complete |                                                                    |
| ggNPY6R        | *           | Rhodopsin B | Known  | Y | complete | probable orthologue to human pseudogene y6                         |
| ggNPY7R        | *           | Rhodopsin B | Known  | Y | complete | probable orthologue to fish Y7                                     |
| ggNTSR1        | NA          | Rhodopsin B | 1      | N | partial  | missing exon 1                                                     |
| ggOXTR         | NP_00102674 | Rhodopsin B | Known  | N | partial  | Missing met, pseudogene or bad genomic sequence, missing exon 2.   |
| ggPPY1R        | AAL84161.1  | Rhodopsin B | Known  | Y | complete |                                                                    |
| ggPRLHR1       | BK005177    | Rhodopsin B | Known  | Y | complete |                                                                    |
| ggPRLHR1B      | BK005491    | Rhodopsin B | Known  | Y | complete |                                                                    |
| ggPRLHR2       | AY572194    | Rhodopsin B | Known  | Y | complete |                                                                    |
| ggTACR1        | NP_990199.1 | Rhodopsin B | Known  | Y | complete |                                                                    |
| ggTACR2        | NA          | Rhodopsin B | 1      | N | partial  | missing parts of transmembrane region due to poor genomic sequence |
| ggTACR3        | NA          | Rhodopsin B | 1      | Y | complete |                                                                    |
| ggVT1          | AAF18344.1  | Rhodopsin B | Known  | Y | complete |                                                                    |
| ggAGTR1        | NP_990488.1 | Rhodopsin C | Known  | Y | complete |                                                                    |
| ggAGTR2        | NA          | Rhodopsin C | 2      | Y | complete |                                                                    |
| ggAGTRL1       | NP_990488.1 | Rhodopsin C | Known  | N | partial  | missing transmembrane region 1 due to poor sequence                |
| ggBDKRB1       | *           | Rhodopsin C | 3      | Y | complete |                                                                    |
| ggBDKRB2       | CAA05099.1  | Rhodopsin C | Known  | Y | complete | Alt. Ornithokinin                                                  |
| ggC3AR         | NP_00102594 | Rhodopsin C | Known  | Y | complete |                                                                    |
| ggC5L2         | NA          | Rhodopsin C | 1      | Y | complete |                                                                    |
| ggCCBP2        | NA          | Rhodopsin C | 1      | Y | partial  | missing first Met                                                  |
| ggCCR11        | NA          | Rhodopsin C | 1      | Y | complete |                                                                    |
| ggCCR2/5n1a    | CAF28777.1  | Rhodopsin C | Known  | Y | complete |                                                                    |
| ggCCR2/5n1b    | NA          | Rhodopsin C | 3      | Y | complete |                                                                    |
| ggCCR2/5n1c    | CAF28776.1  | Rhodopsin C | Known* | N | partial  | missing first part of transmembrane region                         |
| ggCCR4         | NA          | Rhodopsin C | 1      | Y | complete |                                                                    |
| ggCCR6         | NA          | Rhodopsin C | 1      | Y | partial  | missing first Met                                                  |
| ggCCR7         | NA          | Rhodopsin C | 1      | Y | partial  | missing exon 1                                                     |
| ggCCR8a        | CAF28778.1  | Rhodopsin C | Known  | Y | complete |                                                                    |
| ggCCR8b        | NP_00102616 | Rhodopsin C | Known  | Y | complete |                                                                    |
| ggCCR9         | CAF28781.1  | Rhodopsin C | Known  | Y | complete |                                                                    |
| ggCCXCR1       | CAF28779.1  | Rhodopsin C | Known  | Y | complete |                                                                    |
| ggCMKLR1       | NA          | Rhodopsin C | 1      | Y | complete |                                                                    |

|            |             |           |   |       |   |          |                                                                                       |
|------------|-------------|-----------|---|-------|---|----------|---------------------------------------------------------------------------------------|
| ggCMKLR2   | NP_00102608 | Rhodopsin | C | Known | Y | complete |                                                                                       |
| ggCXC3R1   | NA          | Rhodopsin | C | 1     | Y | complete |                                                                                       |
| ggCXCR4    | NP_989948.1 | Rhodopsin | C | Known | Y | complete |                                                                                       |
| ggCXCR5    | AAC23950.1  | Rhodopsin | C | Known | Y | complete |                                                                                       |
| ggGALR1    | NA          | Rhodopsin | C | 1     | Y | complete |                                                                                       |
| ggGALR2    | NA          | Rhodopsin | C | 1     | Y | complete |                                                                                       |
| ggGALR2n1  | NA          | Rhodopsin | C | 1     | Y | partial  | missing first Met and last part of cytosolic region                                   |
| ggGPR1     | NA          | Rhodopsin | C | 1     | Y | complete |                                                                                       |
| ggGPR15    | NA          | Rhodopsin | C | 2     | Y | complete |                                                                                       |
| ggCMKLR1n1 | NA          | Rhodopsin | C | 1     | Y | complete |                                                                                       |
| ggGPR7     | NA          | Rhodopsin | C | 1     | Y | complete |                                                                                       |
| ggMCHR1    | NA          | Rhodopsin | C | 1     | N | partial  | missing first and last part due to poor genomic sequence                              |
| ggOPRD1    | NA          | Rhodopsin | C | 1     | N | partial  | missing last exon                                                                     |
| ggOPRK1    | NA          | Rhodopsin | C | 1     | Y | complete |                                                                                       |
| ggOPRL1    | NA          | Rhodopsin | C | 1     | Y | complete |                                                                                       |
| ggOPRM1    | NA          | Rhodopsin | C | 1     | Y | complete |                                                                                       |
| ggRDC1     | NA          | Rhodopsin | C | 2     | N | partial  | Missing first part due to poor genomic sequence                                       |
| ggRLN3R1   | NA          | Rhodopsin | C | 1     | Y | complete |                                                                                       |
| ggSSTR1    | NA          | Rhodopsin | C | 1     | Y | complete |                                                                                       |
| ggSSTR2    | AAK33003.1  | Rhodopsin | C | Known | N | partial  |                                                                                       |
| ggSSTR3    | NP_00101975 | Rhodopsin | C | Known | Y | complete |                                                                                       |
| ggSSTR4    | AAY82239.1  | Rhodopsin | C | Known | Y | complete |                                                                                       |
| ggSSTR5    | NP_00102000 | Rhodopsin | C | Known | Y | complete |                                                                                       |
| ggUTS2R    | NA          | Rhodopsin | C | 1     | Y | complete |                                                                                       |
| ggUTIIin2  | NA          | Rhodopsin | C | 3     | N | partial  |                                                                                       |
| ggUTIIin1  | NA          | Rhodopsin | C | 3     | Y | complete |                                                                                       |
| ggCYSLTR1  | NA          | Rhodopsin | D | 1     | Y | complete |                                                                                       |
| ggCYSLTR2  | NA          | Rhodopsin | D | 2     | Y | complete |                                                                                       |
| ggEBI2     | NA          | Rhodopsin | D | 1     | Y | complete |                                                                                       |
| ggEBVR     | NA          | Rhodopsin | D | 3     | N | partial  | missing part of transmembrane region and cytosolic part due to poor genomic sequence  |
| ggF2R      | NA          | Rhodopsin | D | 1     | Y | complete | Not well conserved in the start                                                       |
| ggF2RL1    | NP_00101262 | Rhodopsin | D | Known | Y | complete | Not well conserved in the start                                                       |
| ggF2RL3    | NA          | Rhodopsin | D | 1     | Y | complete |                                                                                       |
| ggF2RL3n1  | NA          | Rhodopsin | D | 4     | Y | complete |                                                                                       |
| ggFKSG79   | NP_00100846 | Rhodopsin | D | Known | Y | complete |                                                                                       |
| ggFSHR     | NP_990410.1 | Rhodopsin | D | Known | Y | complete |                                                                                       |
| ggG2A      | NA          | Rhodopsin | D | 3     | N | partial  | missing part of transmembrane region and cytosolic part due to poor genomic sequence  |
| ggGPR17    | NA          | Rhodopsin | D | 1     | Y | partial  | missing exon 1                                                                        |
| ggGPR18    | NA          | Rhodopsin | D | 2     | N | partial  | missing part of transmembrane region and cytosolic part due to poor genomic sequence  |
| ggGPR20    | NA          | Rhodopsin | D | 1     | Y | complete |                                                                                       |
| ggGPR34    | AAP04299.1  | Rhodopsin | D | Known | Y | complete |                                                                                       |
| ggGPR34n1  | NA          | Rhodopsin | D | 1     | Y | complete |                                                                                       |
| ggGPR43n1a | NA          | Rhodopsin | D | 1     | N | partial  | missing extracellular, transmembrane and cytosolic parts due to poor genomic sequence |
| ggGPR43n1b | NA          | Rhodopsin | D | 1     | Y | complete |                                                                                       |
| ggGPR43n1c | NA          | Rhodopsin | D | 1     | Y | complete |                                                                                       |
| ggGPR43n1d | NA          | Rhodopsin | D | 1     | Y | complete |                                                                                       |
| ggGPR43n1e | NA          | Rhodopsin | D | 1     | Y | complete |                                                                                       |
| ggGPR43n1f | NA          | Rhodopsin | D | 1     | Y | complete |                                                                                       |
| ggGPR43n1g | NA          | Rhodopsin | D | 1     | Y | partial  | Missing C-term due to Ns                                                              |
| ggGPR43n1h | NA          | Rhodopsin | D | 1     | Y | complete |                                                                                       |
| ggGPR55    | NA          | Rhodopsin | D | 1     | Y | complete |                                                                                       |
| ggGPR65    | NA          | Rhodopsin | D | 1     | Y | complete |                                                                                       |
| ggGPR82    | NA          | Rhodopsin | D | 3     | Y | complete |                                                                                       |
| ggGPR87    | NA          | Rhodopsin | D | 1     | Y | complete |                                                                                       |
| ggSUCNR1   | NA          | Rhodopsin | D | 1     | Y | complete |                                                                                       |
| ggGPR92    | NA          | Rhodopsin | D | 3     | Y | complete |                                                                                       |

|            |             |           |           |        |   |          |                                                                                                  |
|------------|-------------|-----------|-----------|--------|---|----------|--------------------------------------------------------------------------------------------------|
| ggCYSLTRn1 | NA          | Rhodopsin | D         | 1      | Y | complete |                                                                                                  |
| ggMRGn3    | NA          | Rhodopsin | D         | 1      | Y | complete |                                                                                                  |
| ggMRGn1    | NA          | Rhodopsin | D         | 1      | Y | complete |                                                                                                  |
| ggMRGn2    | NA          | Rhodopsin | D         | 1      | N | partial  | missing part of xetracellular region and transmembrane part due to poor genomic sequence         |
| ggMRGn4    | NA          | Rhodopsin | D         | 1      | Y | complete |                                                                                                  |
| ggMRGn5    | NA          | Rhodopsin | D         | 1      | Y | complete |                                                                                                  |
| ggH963     | NA          | Rhodopsin | D         | 3      | Y | complete |                                                                                                  |
| ggLGR4     | NA          | Rhodopsin | D         | 4      | Y | partial  | missing all exons except the last                                                                |
| ggLGR5     | NA          | Rhodopsin | D         | 2      | Y | partial  | missing parts of extracellular region                                                            |
| ggLGR7     | NA          | Rhodopsin | D         | 2      | N | partial  | missing exon 1, 2, 3 and 8                                                                       |
| ggLGRn1    | NA          | Rhodopsin | D         | 1      | Y | partial  | missing parts of extracellular region                                                            |
| ggLHCGR    | NP_990267.1 | Rhodopsin | D         | Known  | Y | complete |                                                                                                  |
| ggMAS      | NA          | Rhodopsin | D         | 1      | Y | complete |                                                                                                  |
| ggOGR1     | NA          | Rhodopsin | D         | 1      | Y | complete |                                                                                                  |
| ggP2Y1     | NP_990664.1 | Rhodopsin | D         | Known  | Y | complete |                                                                                                  |
| ggP2Y10a   | NA          | Rhodopsin | D         | 1      | Y | complete |                                                                                                  |
| ggP2Y10b   | NA          | Rhodopsin | D         | 1      | N | partial  | missing part of transmembrane region                                                             |
| ggP2Y12    | NA          | Rhodopsin | D         | 1      | Y | complete |                                                                                                  |
| ggP2Y13    | NA          | Rhodopsin | D         | 1      | Y | complete |                                                                                                  |
| ggP2Y14    | NA          | Rhodopsin | D         | 3      | Y | complete |                                                                                                  |
| ggP2Y15b   | NA          | Rhodopsin | D         | 2      | Y | complete |                                                                                                  |
| ggP2Y15a   | NA          | Rhodopsin | D         | 4      | Y | complete |                                                                                                  |
| ggP2Y1n1   | NA          | Rhodopsin | D         | 1      | N | partial  | missing extracellular region and first part of transmembrane region due to poor genomic sequence |
| ggP2Y2     | NA          | Rhodopsin | D         | 4      | Y | complete |                                                                                                  |
| ggP2Y4     | NA          | Rhodopsin | D         | 1      | Y | complete |                                                                                                  |
| ggP2Y5     | P32250      | Rhodopsin | D         | Known* | Y | complete |                                                                                                  |
| ggP2Y6     | NP_990526.1 | Rhodopsin | D         | Known  | Y | complete |                                                                                                  |
| ggP2Y8     | NP_00100867 | Rhodopsin | D         | Known  | Y | complete |                                                                                                  |
| ggP2Y9     | NA          | Rhodopsin | D         | 1      | Y | complete |                                                                                                  |
| ggPTFAR    | NA          | Rhodopsin | D         | 2      | Y | complete |                                                                                                  |
| ggTSHR     | BAE44410.1  | Rhodopsin | D         | Known  | Y | partial  | missing part of extracellular region                                                             |
| ggCOR7a    | CAB01847.1  | Rhodopsin | olfactory | Known  |   |          |                                                                                                  |
| ggOR1      | NA          | Rhodopsin | Olfactory | 1      |   |          | Missing TM5-stop due to Ns                                                                       |
| ggOR2      | NA          | Rhodopsin | olfactory | 1      |   |          | Missing C-term due to Ns                                                                         |
| ggOR3      | NA          | Rhodopsin | olfactory | 1      |   |          | Missing C-term due to Ns                                                                         |
| ggOR4      | NA          | Rhodopsin | olfactory | 1      |   |          | Missing C-term due to Ns                                                                         |
| ggOR5      | NA          | Rhodopsin | olfactory | 1      |   |          | Missing C-term due to Ns                                                                         |
| ggOR6      | NA          | Rhodopsin | olfactory | 1      |   |          | Missing C-term due to Ns                                                                         |
| ggCOR7b    | CAB01848.1  | Rhodopsin | olfactory | Known  |   |          | Missing C-term due to Ns                                                                         |
| ggOR8      | NA          | Rhodopsin | olfactory | 1      |   |          | Missing first half due to Ns                                                                     |
| ggOR9      | NA          | Rhodopsin | olfactory | 1      |   |          | Missing last part due to Ns                                                                      |
| ggOR10     | NA          | Rhodopsin | olfactory | 1      |   |          | Missing last part due to Ns                                                                      |
| ggOR11     | NA          | Rhodopsin | olfactory | 1      |   |          | Missing Last part due to Ns                                                                      |
| ggOR12     | NA          | Rhodopsin | olfactory | 1      |   |          | Missing Last part due to Ns                                                                      |
| ggOR13     | NA          | Rhodopsin | olfactory | 1      |   |          | Missing Met due to Ns                                                                            |
| ggOR14     | NA          | Rhodopsin | olfactory | 1      |   |          | Missing Met -TM3 due to N                                                                        |
| ggOR15     | NA          | Rhodopsin | olfactory | 1      |   |          | Missing Met -TM3 due to N                                                                        |
| ggOR16     | NA          | Rhodopsin | olfactory | 1      |   |          | Missing Met-TM3                                                                                  |
| ggOR17     | NA          | Rhodopsin | olfactory | 1      |   |          | Missing Met-TM3 due to N                                                                         |
| ggOR18     | NA          | Rhodopsin | olfactory | 1      |   |          | Missing Met-TM3 due to Ns                                                                        |
| ggOR19     | NA          | Rhodopsin | olfactory | 1      |   |          | Missing Met-TM3 due to Ns                                                                        |
| ggOR20     | NA          | Rhodopsin | olfactory | 1      |   |          | Missing Met-TM3 due to Ns                                                                        |
| ggOR21     | NA          | Rhodopsin | olfactory | 1      |   |          | Missing Met-TM5 due to Ns                                                                        |
| ggOR22     | NA          | Rhodopsin | olfactory | 1      |   |          | Missing N och C-term due to Ns                                                                   |
| ggOR23     | NA          | Rhodopsin | olfactory | 1      |   |          | Missing N-term due to Ns                                                                         |
| ggOR24     | NA          | Rhodopsin | olfactory | 1      |   |          | Missing N-term due to Ns                                                                         |



|         |    |           |           |   |                              |
|---------|----|-----------|-----------|---|------------------------------|
| ggOR82  | NA | Rhodopsin | olfactory | 1 | Missing TM7-C-term due to Ns |
| ggOR83  | NA | Rhodopsin | olfactory | 1 | Missing TM7-c-term due to Ns |
| ggOR84  | NA | Rhodopsin | olfactory | 1 | Missing TM7-stop due to Ns   |
| ggOR85  | NA | Rhodopsin | olfactory | 1 | Missing TM7-stop due to Ns   |
| ggOR86  | NA | Rhodopsin | olfactory | 1 | Missing TM7-stop due to Ns   |
| ggOR87  | NA | Rhodopsin | olfactory | 1 | Missing TM7-stop due to Ns   |
| ggOR88  | NA | Rhodopsin | olfactory | 1 |                              |
| ggOR89  | NA | Rhodopsin | olfactory | 1 |                              |
| ggOR90  | NA | Rhodopsin | olfactory | 1 |                              |
| ggOR91  | NA | Rhodopsin | olfactory | 1 |                              |
| ggOR92  | NA | Rhodopsin | olfactory | 1 |                              |
| ggOR93  | NA | Rhodopsin | olfactory | 1 |                              |
| ggOR94  | NA | Rhodopsin | olfactory | 1 |                              |
| ggOR95  | NA | Rhodopsin | olfactory | 1 |                              |
| ggOR96  | NA | Rhodopsin | olfactory | 1 |                              |
| ggOR97  | NA | Rhodopsin | olfactory | 1 |                              |
| ggOR98  | NA | Rhodopsin | olfactory | 1 |                              |
| ggOR99  | NA | Rhodopsin | olfactory | 1 |                              |
| ggOR100 | NA | Rhodopsin | olfactory | 1 |                              |
| ggOR101 | NA | Rhodopsin | olfactory | 1 |                              |
| ggOR102 | NA | Rhodopsin | olfactory | 1 |                              |
| ggOR103 | NA | Rhodopsin | olfactory | 1 |                              |
| ggOR104 | NA | Rhodopsin | olfactory | 1 |                              |
| ggOR105 | NA | Rhodopsin | olfactory | 1 |                              |
| ggOR106 | NA | Rhodopsin | olfactory | 1 |                              |
| ggOR107 | NA | Rhodopsin | olfactory | 1 |                              |
| ggOR108 | NA | Rhodopsin | olfactory | 1 |                              |
| ggOR109 | NA | Rhodopsin | olfactory | 1 |                              |
| ggOR110 | NA | Rhodopsin | olfactory | 1 |                              |
| ggOR111 | NA | Rhodopsin | olfactory | 1 |                              |
| ggOR112 | NA | Rhodopsin | olfactory | 1 |                              |
| ggOR113 | NA | Rhodopsin | olfactory | 1 |                              |
| ggOR114 | NA | Rhodopsin | olfactory | 1 |                              |
| ggOR115 | NA | Rhodopsin | olfactory | 1 |                              |
| ggOR116 | NA | Rhodopsin | olfactory | 1 |                              |
| ggOR117 | NA | Rhodopsin | olfactory | 1 |                              |
| ggOR118 | NA | Rhodopsin | olfactory | 1 |                              |
| ggOR119 | NA | Rhodopsin | olfactory | 1 |                              |
| ggOR120 | NA | Rhodopsin | olfactory | 1 |                              |
| ggOR121 | NA | Rhodopsin | olfactory | 1 |                              |
| ggOR122 | NA | Rhodopsin | olfactory | 1 |                              |
| ggOR123 | NA | Rhodopsin | olfactory | 1 |                              |
| ggOR124 | NA | Rhodopsin | olfactory | 1 |                              |
| ggOR125 | NA | Rhodopsin | olfactory | 1 |                              |
| ggOR126 | NA | Rhodopsin | olfactory | 1 |                              |
| ggOR127 | NA | Rhodopsin | olfactory | 1 |                              |
| ggOR128 | NA | Rhodopsin | olfactory | 1 |                              |
| ggOR129 | NA | Rhodopsin | olfactory | 1 |                              |
| ggOR130 | NA | Rhodopsin | olfactory | 1 |                              |
| ggOR131 | NA | Rhodopsin | olfactory | 1 |                              |
| ggOR132 | NA | Rhodopsin | olfactory | 1 |                              |
| ggOR133 | NA | Rhodopsin | olfactory | 1 |                              |
| ggOR134 | NA | Rhodopsin | olfactory | 1 |                              |
| ggOR135 | NA | Rhodopsin | olfactory | 1 |                              |
| ggOR136 | NA | Rhodopsin | olfactory | 1 |                              |
| ggOR137 | NA | Rhodopsin | olfactory | 1 |                              |
| ggOR138 | NA | Rhodopsin | olfactory | 1 |                              |



|         |    |           |           |   |
|---------|----|-----------|-----------|---|
| ggOR139 | NA | Rhodopsin | olfactory | 1 |
| ggOR140 | NA | Rhodopsin | olfactory | 1 |
| ggOR141 | NA | Rhodopsin | olfactory | 1 |
| ggOR142 | NA | Rhodopsin | olfactory | 1 |
| ggOR143 | NA | Rhodopsin | olfactory | 1 |
| ggOR144 | NA | Rhodopsin | olfactory | 1 |
| ggOR145 | NA | Rhodopsin | olfactory | 1 |
| ggOR146 | NA | Rhodopsin | olfactory | 1 |
| ggOR147 | NA | Rhodopsin | olfactory | 1 |
| ggOR148 | NA | Rhodopsin | olfactory | 1 |
| ggOR149 | NA | Rhodopsin | olfactory | 1 |
| ggOR150 | NA | Rhodopsin | olfactory | 1 |
| ggOR151 | NA | Rhodopsin | olfactory | 1 |
| ggOR152 | NA | Rhodopsin | olfactory | 1 |
| ggOR153 | NA | Rhodopsin | olfactory | 1 |
| ggOR154 | NA | Rhodopsin | olfactory | 1 |
| ggOR155 | NA | Rhodopsin | olfactory | 1 |
| ggOR156 | NA | Rhodopsin | olfactory | 1 |
| ggOR157 | NA | Rhodopsin | olfactory | 1 |
| ggOR158 | NA | Rhodopsin | olfactory | 1 |
| ggOR159 | NA | Rhodopsin | olfactory | 1 |
| ggOR160 | NA | Rhodopsin | olfactory | 1 |
| ggOR161 | NA | Rhodopsin | olfactory | 1 |
| ggOR162 | NA | Rhodopsin | olfactory | 1 |
| ggOR163 | NA | Rhodopsin | olfactory | 1 |
| ggOR164 | NA | Rhodopsin | olfactory | 1 |
| ggOR165 | NA | Rhodopsin | olfactory | 1 |
| ggOR166 | NA | Rhodopsin | olfactory | 1 |
| ggOR167 | NA | Rhodopsin | olfactory | 1 |
| ggOR168 | NA | Rhodopsin | olfactory | 1 |
| ggOR169 | NA | Rhodopsin | olfactory | 1 |
| ggOR170 | NA | Rhodopsin | olfactory | 1 |
| ggOR171 | NA | Rhodopsin | olfactory | 1 |
| ggOR172 | NA | Rhodopsin | olfactory | 1 |
| ggOR173 | NA | Rhodopsin | olfactory | 1 |
| ggOR174 | NA | Rhodopsin | olfactory | 1 |
| ggOR175 | NA | Rhodopsin | olfactory | 1 |
| ggOR176 | NA | Rhodopsin | olfactory | 1 |
| ggOR177 | NA | Rhodopsin | olfactory | 1 |
| ggOR178 | NA | Rhodopsin | olfactory | 1 |
| ggOR179 | NA | Rhodopsin | olfactory | 1 |
| ggOR180 | NA | Rhodopsin | olfactory | 1 |
| ggOR181 | NA | Rhodopsin | olfactory | 1 |
| ggOR182 | NA | Rhodopsin | olfactory | 1 |
| ggOR183 | NA | Rhodopsin | olfactory | 1 |
| ggOR184 | NA | Rhodopsin | olfactory | 1 |
| ggOR185 | NA | Rhodopsin | olfactory | 1 |
| ggOR186 | NA | Rhodopsin | olfactory | 1 |
| ggOR187 | NA | Rhodopsin | olfactory | 1 |
| ggOR188 | NA | Rhodopsin | olfactory | 1 |
| ggOR189 | NA | Rhodopsin | olfactory | 1 |
| ggOR190 | NA | Rhodopsin | olfactory | 1 |
| ggOR191 | NA | Rhodopsin | olfactory | 1 |
| ggOR192 | NA | Rhodopsin | olfactory | 1 |
| ggOR193 | NA | Rhodopsin | olfactory | 1 |
| ggOR194 | NA | Rhodopsin | olfactory | 1 |
| ggOR195 | NA | Rhodopsin | olfactory | 1 |

|           |             |           |           |       |   |                            |                                                                         |
|-----------|-------------|-----------|-----------|-------|---|----------------------------|-------------------------------------------------------------------------|
| ggOR196   | NA          | Rhodopsin | olfactory | 1     |   |                            |                                                                         |
| ggOR197   | NA          | Rhodopsin | olfactory | 1     |   |                            |                                                                         |
| ggOR198   | NA          | Rhodopsin | olfactory | 1     |   |                            |                                                                         |
| ggOR199   | NA          | Rhodopsin | olfactory | 1     |   |                            |                                                                         |
| ggOR200   |             |           |           |       |   |                            |                                                                         |
| ggOR201   | NA          | Rhodopsin | olfactory | 1     |   |                            |                                                                         |
| ggOR202   | NA          | Rhodopsin | olfactory | 1     |   |                            |                                                                         |
| ggOR203   | NA          | Rhodopsin | olfactory | 1     |   |                            |                                                                         |
| ggOR204   | NA          | Rhodopsin | olfactory | 1     |   |                            |                                                                         |
| ggOR205   | NA          | Rhodopsin | olfactory | 1     |   |                            |                                                                         |
| ggOR206   | NA          | Rhodopsin | olfactory | 1     |   |                            |                                                                         |
| ggOR207   | NA          | Rhodopsin | olfactory | 1     |   |                            |                                                                         |
| ggOR208   | NA          | Rhodopsin | olfactory | 1     |   |                            |                                                                         |
| ggOR209   | NA          | Rhodopsin | olfactory | 1     |   |                            |                                                                         |
| ggOR210   | NA          | Rhodopsin | olfactory | 1     |   |                            |                                                                         |
| ggOR211   | NA          | Rhodopsin | olfactory | 1     |   |                            |                                                                         |
| ggOR212   | NA          | Rhodopsin | olfactory | 1     |   |                            |                                                                         |
| ggOR213   | NA          | Rhodopsin | olfactory | 1     |   |                            |                                                                         |
| ggOR214   | NA          | Rhodopsin | olfactory | 1     |   |                            |                                                                         |
| ggOR215   | NA          | Rhodopsin | olfactory | 1     |   |                            |                                                                         |
| ggOR216   |             |           |           |       |   |                            |                                                                         |
| ggOR217   | NA          | Rhodopsin | olfactory | 1     |   |                            |                                                                         |
| ggOR218   | NA          | Rhodopsin | olfactory | 1     |   |                            |                                                                         |
| ggOR219   | NA          | Rhodopsin | olfactory | 1     |   |                            |                                                                         |
| ggOR220   | NA          | Rhodopsin | olfactory | 1     |   | Missing TM3-stop due to Ns |                                                                         |
| ggOR221   | NA          | Rhodopsin | olfactory | 1     |   | Missing C-tern due to Ns   |                                                                         |
| ggOR223   | NA          | Rhodopsin | olfactory | 1     |   |                            |                                                                         |
| COR1      | P37067      | Rhodopsin | olfactory | Known |   |                            |                                                                         |
| COR2      | P37068      | Rhodopsin | olfactory | Known |   |                            |                                                                         |
| COR3      | P37069      | Rhodopsin | olfactory | Known |   |                            |                                                                         |
| COR4      | P37070      | Rhodopsin | olfactory | Known |   |                            |                                                                         |
| COR5      | P37071      | Rhodopsin | olfactory | Known |   |                            |                                                                         |
| COR6      | P37072      | Rhodopsin | olfactory | Known |   |                            |                                                                         |
| ggCALCRn1 | NA          | Secretin  |           | 1     | Y | partial                    | missing exon 1                                                          |
| ggCALCRL  | NA          | Secretin  |           | 1     | Y | partial                    | missing exon 1                                                          |
| ggCRHR1   | NP_989652.1 | Secretin  |           | Known | Y | complete                   |                                                                         |
| ggCRHR2   | NP_989785.1 | Secretin  |           | Known | Y | partial                    | missing first exon and the two last exons                               |
| ggGCGR    | NA          | Secretin  |           | 1     | N | partial                    | missing large part of the gene                                          |
| ggGIPR    | NA          | Secretin  |           | 1     | N | partial                    | only exon 7                                                             |
| ggGLP1R   | NA          | Secretin  |           | 1     | Y | partial                    | missing exon 1                                                          |
| ggPACAPR  | NA          | Secretin  |           | 1     | Y | partial                    | missing exon 1                                                          |
| ggPTHR1   | NA          | Secretin  |           | 1     | Y | partial                    | missing parts of extracellular region                                   |
| ggPTHR2   | NA          | Secretin  |           | 3     | N | partial                    | missing exon 1 and one internal exon                                    |
| ggSCTR    | NA          | Secretin  |           | 1     | Y | partial                    | missing exon 1                                                          |
| ggVIPR1   | BAA95164.1  | Secretin  |           | Known | Y | partial                    | missing exon 1                                                          |
| ggGHRHR   | NA          | Secretin  |           | 1     | Y | partial                    | missing large part of extracellular region due to poor genomic sequence |
| ggVIPR2   | NP_00101497 | Secretin  |           | Known | Y | partial                    | missing exon 1                                                          |
| ggTAS2Rn1 | NA          | Taste 2   |           | 1     | Y | complete                   |                                                                         |
| ggTAS2Rn2 | NA          | Taste 2   |           | 4     | Y | complete                   |                                                                         |
| ggTAS2Rn3 | NA          | Taste 2   |           | 4     | Y | complete                   |                                                                         |
